# Supplementary material for: The effect of high and low velocity-based training on the throwing performance of collegiate handball players
Source: PeerJ. 2022 Sep 28;10:e14049. doi: 10.7717/peerj.14049 (PMC9526411; doi:10.7717/peerj.14049)
Supplement: Supplemental Information 1 [file peerj-10-14049-s001.xls]

## Sheet: Sheet3
Group	Age	Height	Pre.BW	Post.BW	Pre.BF	Post.BF	Pre.SKMM	Post.SKMM	Pre.1RM	Post.1RM	Pre.FTS	Post.FTS
2	19	174	58	59.8	9	10.5	30	30.2	50	70	12.46	15.7
2	19	172	58	59.9	14.2	12.5	27.7	29.5	40	55	12.99	18.15
2	19	165	57	56.2	14.8	14.7	27.2	26.7	50	50	13.59	19.25
2	21	179	87	91.1	12.2	9.8	44.2	47.8	95	120	10.9	11.45
2	20	169	75	74.1	31.6	28.5	29	29.8	45	52.5	16.95	23.41
2	20	168	75	77.2	28.5	28.4	29.6	31.4	45	47.5	13.23	18.94
2	21	172	62	62.4	13.4	7.3	30.7	33	60	65	20.21	18.68
2	20	167	77	76.6	22.8	20.6	33.9	34.8	55	62.5	15.93	17.46
2	22	176	70	71.1	14.1	13.6	33.5	35	72.5	92.5	12.26	15.37
2	20	169	62	67.1	17	20.1	29.3	30.5	60	65	16.22	20.14
2	20	164	57	58.2	15.1	16.4	27.3	27.4	50	62.5	11.64	14.59
1	20	178	97	97.8	35.4	34.4	35.6	35.9	47.5	65	11.57	14.66
1	19	175	72	70.4	14.9	12.3	35.2	35.5	67.5	77.5	14.3	22.48
1	19	178	62	60.3	10.9	10.9	31.3	30.5	50	72.5	15.49	18.88
1	20	173	56	57.8	8.8	8.8	28.8	29.7	50	60	16.49	15.89
1	20	165	62	64.9	23	21.7	27.2	28.9	50	50	13.54	15.12
1	19	171	73	76.3	27.1	25	29.8	31.8	40	47.5	12.11	15.2
1	19	168	57	56.3	19.6	17.3	25.4	26	50	62.5	12.36	15.78
1	19	169	69	70.4	24.1	18.6	29.8	32.4	70	75	17.87	24.58
1	21	172	68	69.8	17.4	16.2	32.1	33.3	65	72.5	16.2	21.8
1	20	168	54	50	15.1	13.7	25.5	26.9	50	62.5	16.58	17.82
1	20	178	81	81.7	16.3	16.1	39.2	39.6	90	100	15.96	20.4
